# Supplementary material
Source: ML conference proceedings conference paper supplement (https://proceedings.mlr.press/v70/guo17a.html)
Supplement: Supplementary file 1 [file guo17a-supp.pdf]

---

## Supplementary Materials for: On Calibration of Modern Neural Networks

---

### S1. Further Information on Calibration Metrics

We can connect the ECE metric with our exact miscalibration definition, which is restated here:

$$\mathbb{E}_{\hat{P}} \left[ \left| \mathbb{P} \left( \hat{Y} = Y \mid \hat{P} = p \right) - p \right| \right]$$

Let  $F_{\hat{P}}(p)$  be the cumulative distribution function of  $\hat{P}$  so that  $F_{\hat{P}}(b) - F_{\hat{P}}(a) = \mathbb{P}(\hat{P} \in [a, b])$ . Using the Riemann-Stieltjes integral we have

$$\begin{aligned} & \mathbb{E}_{\hat{P}} \left[ \left| \mathbb{P} \left( \hat{Y} = Y \mid \hat{P} = p \right) - p \right| \right] \\ &= \int_0^1 \left| \mathbb{P} \left( \hat{Y} = Y \mid \hat{P} = p \right) - p \right| dF_{\hat{P}}(p) \\ &\approx \sum_{m=1}^M \left| \mathbb{P}(\hat{Y} = Y \mid \hat{P} = p_m) - p_m \right| \mathbb{P}(\hat{P} \in I_m) \end{aligned}$$

where  $I_m$  represents the interval of bin  $B_m$ .  $\left| \mathbb{P}(\hat{Y} = Y \mid \hat{P} = p_m) - p_m \right|$  is closely approximated by  $|\text{acc}(B_m) - \hat{p}(B_m)|$  for  $n$  large. Hence ECE using  $M$  bins converges to the  $M$ -term Riemann-Stieltjes sum of  $\mathbb{E}_{\hat{P}} \left[ \left| \mathbb{P} \left( \hat{Y} = Y \mid \hat{P} = p \right) - p \right| \right]$ .

### S2. Further Information on Temperature Scaling

Here we derive the temperature scaling model using the entropy maximization principle with an appropriate balanced equation.

**Claim 1.** *Given  $n$  samples' logit vectors  $\mathbf{z}_1, \dots, \mathbf{z}_n$  and class labels  $y_1, \dots, y_n$ , temperature scaling is the unique solution  $q$  to the following entropy maximization problem:*

$$\begin{aligned} & \max_q \quad - \sum_{i=1}^n \sum_{k=1}^K q(\mathbf{z}_i)^{(k)} \log q(\mathbf{z}_i)^{(k)} \\ & \text{subject to} \quad q(\mathbf{z}_i)^{(k)} \geq 0 \quad \forall i, k \\ & \quad \quad \quad \sum_{k=1}^K q(\mathbf{z}_i)^{(k)} = 1 \quad \forall i \\ & \quad \quad \quad \sum_{i=1}^n z_i^{(y_i)} = \sum_{i=1}^n \sum_{k=1}^K z_i^{(k)} q(\mathbf{z}_i)^{(k)}. \end{aligned}$$

The first two constraint ensure that  $q$  is a probability distribution, while the last constraint limits the scope of distributions. Intuitively, the constraint specifies that the average true class logit is equal to the average weighted logit.

*Proof.* We solve this constrained optimization problem using the Lagrangian. We first ignore the constraint  $q(\mathbf{z}_i)^{(k)}$  and later show that the solution satisfies this condition. Let  $\lambda, \beta_1, \dots, \beta_n \in \mathbb{R}$  be the Lagrangian multipliers and define

$$\begin{aligned} L = & - \sum_{i=1}^n \sum_{k=1}^K q(\mathbf{z}_i)^{(k)} \log q(\mathbf{z}_i)^{(k)} \\ & + \lambda \sum_{i=1}^n \left[ \sum_{k=1}^K z_i^{(k)} q(\mathbf{z}_i)^{(k)} - z_i^{(y_i)} \right] \\ & + \sum_{i=1}^n \beta_i \sum_{k=1}^K (q(\mathbf{z}_i)^{(k)} - 1). \end{aligned}$$

Taking the derivative with respect to  $q(\mathbf{z}_i)^{(k)}$  gives

$$\frac{\partial}{\partial q(\mathbf{z}_i)^{(k)}} L = -nK - \log q(\mathbf{z}_i)^{(k)} + \lambda z_i^{(k)} + \beta_i.$$

Setting the gradient of the Lagrangian  $L$  to 0 and rearranging gives

$$q(\mathbf{z}_i)^{(k)} = e^{\lambda z_i^{(k)} + \beta_i - nK}.$$

Since  $\sum_{k=1}^K q(\mathbf{z}_i)^{(k)} = 1$  for all  $i$ , we must have

$$q(\mathbf{z}_i)^{(k)} = \frac{e^{\lambda z_i^{(k)}}}{\sum_{j=1}^K e^{\lambda z_i^{(j)}}},$$

which recovers the temperature scaling model by setting  $T = \frac{1}{\lambda}$ .  $\square$

**Figure S1** visualizes Claim 1. We see that, as training continues, the model begins to overfit with respect to NLL (red line). This results in a low-entropy softmax distribution over classes (blue line), which explains the model's overconfidence. Temperature scaling not only lowers the NLL but also raises the entropy of the distribution (green line).

### S3. Additional Tables

Tables **S1**, **S2**, and **S3** display the MCE, test error, and NLL for all the experimental settings outlined in **Section 5**.

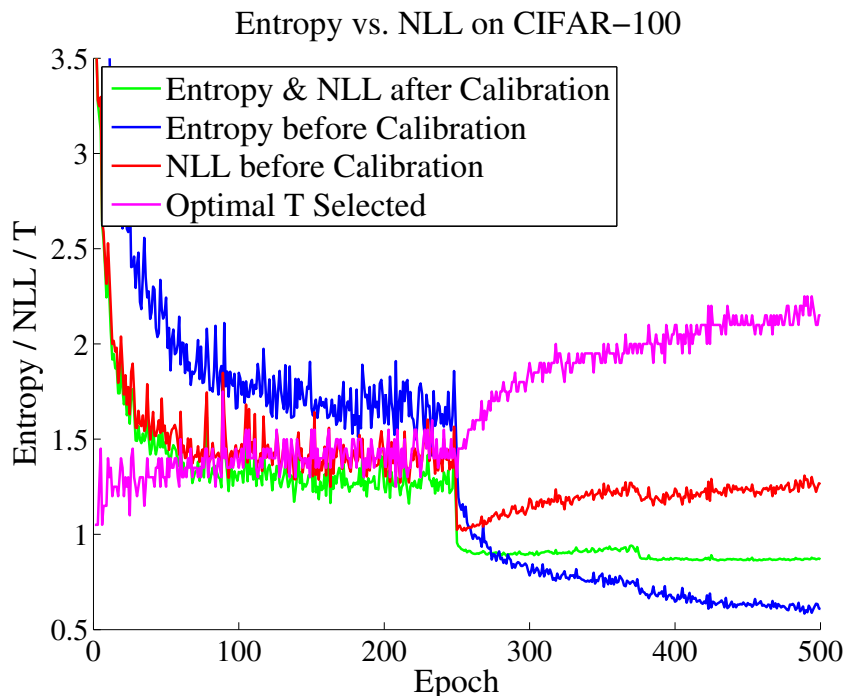

Figure S1. Entropy and NLL for CIFAR-100 before and after calibration. The optimal  $T$  selected by temperature scaling rises throughout optimization, as the pre-calibration entropy decreases steadily. The post-calibration entropy and NLL on the validation set coincide (which can be derived from the gradient optimality condition of  $T$ ).

| Dataset          | Model           | Uncalibrated  | Hist. Binning | Isotonic     | BBQ          | Temp. Scaling | Vector Scaling | Matrix Scaling |
|------------------|-----------------|---------------|---------------|--------------|--------------|---------------|----------------|----------------|
| Birds            | ResNet 50       | 30.06%        | 25.35%        | 16.59%       | 11.72%       | <b>9.08%</b>  | 9.81%          | 38.67%         |
| Cars             | ResNet 50       | 41.55%        | <b>5.16%</b>  | 15.23%       | 9.31%        | 20.23%        | 8.59%          | 29.65%         |
| CIFAR-10         | ResNet 110      | 33.78%        | 26.87%        | <b>7.8%</b>  | 72.64%       | 8.56%         | 27.39%         | 22.89%         |
| CIFAR-10         | ResNet 110 (SD) | 34.52%        | 17.0%         | 16.45%       | 19.26%       | 15.45%        | 15.55%         | <b>10.74%</b>  |
| CIFAR-10         | Wide ResNet 32  | 27.97%        | 12.19%        | 6.19%        | 9.22%        | 9.11%         | <b>4.43%</b>   | 9.65%          |
| CIFAR-10         | DenseNet 40     | 22.44%        | 7.77%         | 19.54%       | 14.57%       | 4.58%         | <b>3.17%</b>   | 4.36%          |
| CIFAR-10         | LeNet 5         | 8.02%         | 16.49%        | 18.34%       | 82.35%       | <b>5.14%</b>  | 19.39%         | 16.89%         |
| CIFAR-100        | ResNet 110      | 35.5%         | 7.03%         | 10.36%       | 10.9%        | 4.74%         | <b>2.5%</b>    | 45.62%         |
| CIFAR-100        | ResNet 110 (SD) | 26.42%        | 9.12%         | 10.95%       | 9.12%        | <b>8.85%</b>  | <b>8.85%</b>   | 35.6%          |
| CIFAR-100        | Wide ResNet 32  | 33.11%        | 6.22%         | 14.87%       | 11.88%       | <b>5.33%</b>  | 6.31%          | 44.73%         |
| CIFAR-100        | DenseNet 40     | 21.52%        | 9.36%         | 10.59%       | <b>8.67%</b> | 19.4%         | 8.82%          | 38.64%         |
| CIFAR-100        | LeNet 5         | 10.25%        | 18.61%        | <b>3.64%</b> | 9.96%        | 5.22%         | 8.65%          | 18.77%         |
| ImageNet         | DenseNet 161    | 14.07%        | 13.14%        | 11.57%       | 10.96%       | 12.29%        | <b>9.61%</b>   | -              |
| ImageNet         | ResNet 152      | 12.2%         | 14.57%        | <b>8.74%</b> | 8.85%        | 12.29%        | 9.61%          | -              |
| SVHN             | ResNet 152 (SD) | 19.36%        | 11.16%        | 18.67%       | <b>9.09%</b> | 18.05%        | 30.78%         | 18.76%         |
| 20 News          | DAN 3           | 17.03%        | 10.47%        | 9.13%        | <b>6.28%</b> | 8.21%         | 8.24%          | 17.43%         |
| Reuters          | DAN 3           | <b>14.01%</b> | 16.78%        | 44.95%       | 36.18%       | 25.46%        | 18.88%         | 19.39%         |
| SST Binary       | TreeLSTM        | 21.66%        | <b>3.22%</b>  | 13.91%       | 36.43%       | 6.03%         | 6.03%          | 6.03%          |
| SST Fine Grained | TreeLSTM        | 27.85%        | 28.35%        | 19.0%        | <b>8.67%</b> | 44.75%        | 11.47%         | 11.78%         |

Table S1. MCE (%) (with  $M = 15$  bins) on standard vision and NLP datasets before calibration and with various calibration methods. The number following a model’s name denotes the network depth. MCE seems very sensitive to the binning scheme and is less suited for small test sets.

#### S4. Additional Reliability Diagrams

We include reliability diagrams for additional datasets: CIFAR-10 (Figure S2) and SST (Figure S3 and Figure S4). Note that, as mentioned in Section 2, the reliability dia-

grams do not represent the proportion of predictions that belong to a given bin.

Supplementary Materials: On Calibration of Modern Neural Networks

| Dataset          | Model           | Uncalibrated  | Hist. Binning | Isotonic | BBQ           | Temp. Scaling | Vector Scaling | Matrix Scaling |
|------------------|-----------------|---------------|---------------|----------|---------------|---------------|----------------|----------------|
| Birds            | ResNet 50       | <b>22.54%</b> | 55.02%        | 23.37%   | 37.76%        | <b>22.54%</b> | 22.99%         | 29.51%         |
| Cars             | ResNet 50       | 14.28%        | 16.24%        | 14.9%    | 19.25%        | 14.28%        | <b>14.15%</b>  | 17.98%         |
| CIFAR-10         | ResNet 110      | <b>6.21%</b>  | 6.45%         | 6.36%    | 6.25%         | <b>6.21%</b>  | 6.37%          | 6.42%          |
| CIFAR-10         | ResNet 110 (SD) | 5.64%         | 5.59%         | 5.62%    | <b>5.55%</b>  | 5.64%         | 5.62%          | 5.69%          |
| CIFAR-10         | Wide ResNet 32  | <b>6.96%</b>  | 7.3%          | 7.01%    | 7.35%         | <b>6.96%</b>  | 7.1%           | 7.27%          |
| CIFAR-10         | DenseNet 40     | <b>5.91%</b>  | 6.12%         | 5.96%    | 6.0%          | <b>5.91%</b>  | 5.96%          | 6.0%           |
| CIFAR-10         | LeNet 5         | 15.57%        | 15.63%        | 15.69%   | 15.64%        | 15.57%        | <b>15.53%</b>  | 15.81%         |
| CIFAR-100        | ResNet 110      | 27.83%        | 34.78%        | 28.41%   | 28.56%        | 27.83%        | <b>27.82%</b>  | 38.77%         |
| CIFAR-100        | ResNet 110 (SD) | <b>24.91%</b> | 33.78%        | 25.42%   | 25.17%        | <b>24.91%</b> | 24.99%         | 35.09%         |
| CIFAR-100        | Wide ResNet 32  | <b>28.0%</b>  | 34.29%        | 28.61%   | 29.08%        | <b>28.0%</b>  | 28.45%         | 37.4%          |
| CIFAR-100        | DenseNet 40     | 26.45%        | 34.78%        | 26.73%   | 26.4%         | 26.45%        | <b>26.25%</b>  | 36.14%         |
| CIFAR-100        | LeNet 5         | <b>44.92%</b> | 54.06%        | 45.77%   | 46.82%        | <b>44.92%</b> | 45.53%         | 52.44%         |
| ImageNet         | DenseNet 161    | 22.57%        | 48.32%        | 23.2%    | 47.58%        | 22.57%        | <b>22.54%</b>  | -              |
| ImageNet         | ResNet 152      | <b>22.31%</b> | 48.1%         | 22.94%   | 47.6%         | <b>22.31%</b> | 22.56%         | -              |
| SVHN             | ResNet 152 (SD) | <b>1.98%</b>  | 2.06%         | 2.04%    | 2.04%         | <b>1.98%</b>  | 2.0%           | 2.08%          |
| 20 News          | DAN 3           | 20.06%        | 25.12%        | 20.29%   | 20.81%        | 20.06%        | <b>19.89%</b>  | 22.0%          |
| Reuters          | DAN 3           | 2.97%         | 7.81%         | 3.52%    | 3.93%         | 2.97%         | <b>2.83%</b>   | 3.52%          |
| SST Binary       | TreeLSTM        | 11.81%        | 12.08%        | 11.75%   | <b>11.26%</b> | 11.81%        | 11.81%         | 11.81%         |
| SST Fine Grained | TreeLSTM        | 49.5%         | 49.91%        | 48.55%   | 49.86%        | 49.5%         | 49.77%         | <b>48.51%</b>  |

Table S2. Test error (%) on standard vision and NLP datasets before calibration and with various calibration methods. The number following a model’s name denotes the network depth. Error with temperature scaling is exactly the same as uncalibrated.

| Dataset          | Model           | Uncalibrated | Hist. Binning | Isotonic | BBQ    | Temp. Scaling | Vector Scaling | Matrix Scaling |
|------------------|-----------------|--------------|---------------|----------|--------|---------------|----------------|----------------|
| Birds            | ResNet 50       | 0.9786       | 1.6226        | 1.4128   | 1.2539 | <b>0.8792</b> | 0.9021         | 2.334          |
| Cars             | ResNet 50       | 0.5488       | 0.7977        | 0.8793   | 0.6986 | 0.5311        | <b>0.5299</b>  | 1.0206         |
| CIFAR-10         | ResNet 110      | 0.3285       | 0.2532        | 0.2237   | 0.263  | 0.2102        | 0.2088         | <b>0.2048</b>  |
| CIFAR-10         | ResNet 110 (SD) | 0.2959       | 0.2027        | 0.1867   | 0.2159 | 0.1718        | <b>0.1709</b>  | 0.1766         |
| CIFAR-10         | Wide ResNet 32  | 0.3293       | 0.2778        | 0.2428   | 0.2774 | 0.2283        | 0.2275         | <b>0.2229</b>  |
| CIFAR-10         | DenseNet 40     | 0.2228       | 0.212         | 0.1969   | 0.2087 | <b>0.1750</b> | 0.1757         | 0.176          |
| CIFAR-10         | LeNet 5         | 0.4688       | 0.529         | 0.4757   | 0.4984 | 0.459         | <b>0.4568</b>  | 0.4607         |
| CIFAR-100        | ResNet 110      | 1.4978       | 1.4379        | 1.207    | 1.5466 | <b>1.0442</b> | 1.0485         | 2.5637         |
| CIFAR-100        | ResNet 110 (SD) | 1.1157       | 1.1985        | 1.0317   | 1.1982 | <b>0.8613</b> | 0.8655         | 1.8182         |
| CIFAR-100        | Wide ResNet 32  | 1.3434       | 1.4499        | 1.2086   | 1.459  | <b>1.0565</b> | 1.0648         | 2.5507         |
| CIFAR-100        | DenseNet 40     | 1.0134       | 1.2156        | 1.0615   | 1.1572 | 0.9026        | <b>0.9011</b>  | 1.9639         |
| CIFAR-100        | LeNet 5         | 1.6639       | 2.2574        | 1.8173   | 1.9893 | <b>1.6560</b> | 1.6648         | 2.1405         |
| ImageNet         | DenseNet 161    | 0.9338       | 1.4716        | 1.1912   | 1.4272 | 0.8885        | <b>0.8879</b>  | -              |
| ImageNet         | ResNet 152      | 0.8961       | 1.4507        | 1.1859   | 1.3987 | <b>0.8657</b> | 0.8742         | -              |
| SVHN             | ResNet 152 (SD) | 0.0842       | 0.1137        | 0.095    | 0.1062 | <b>0.0821</b> | 0.0844         | 0.0924         |
| 20 News          | DAN 3           | 0.7949       | 1.0499        | 0.8968   | 0.9519 | 0.7387        | <b>0.7296</b>  | 0.9089         |
| Reuters          | DAN 3           | 0.102        | 0.2403        | 0.1475   | 0.1167 | 0.0994        | <b>0.0990</b>  | 0.1491         |
| SST Binary       | TreeLSTM        | 0.3367       | 0.2842        | 0.2908   | 0.2778 | <b>0.2739</b> | <b>0.2739</b>  | <b>0.2739</b>  |
| SST Fine Grained | TreeLSTM        | 1.1475       | 1.1717        | 1.1661   | 1.149  | 1.1168        | <b>1.1085</b>  | 1.1112         |

Table S3. NLL (%) on standard vision and NLP datasets before calibration and with various calibration methods. The number following a model’s name denotes the network depth. To summarize, NLL roughly follows the trends of ECE.

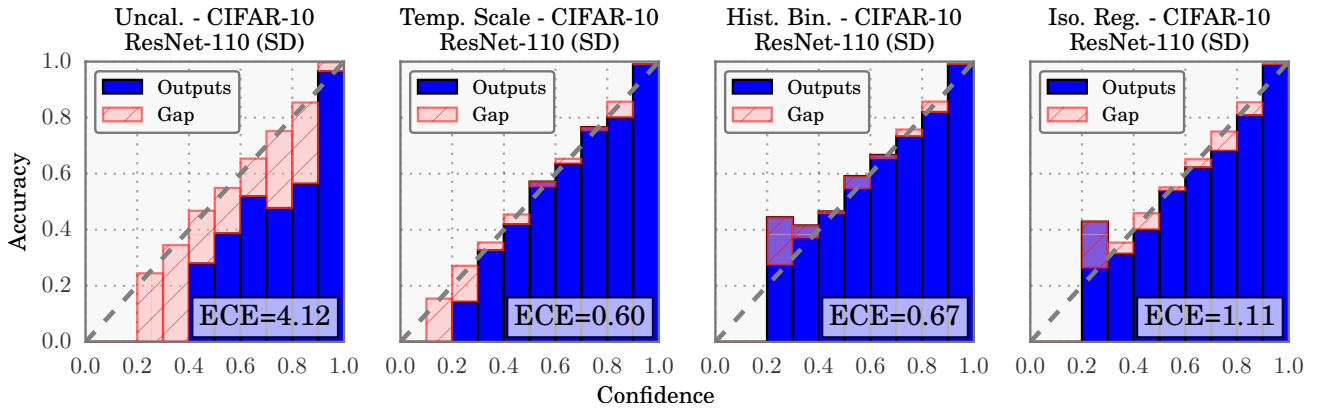

Figure S2. Reliability diagrams for CIFAR-10 before (far left) and after calibration (middle left, middle right, far right).

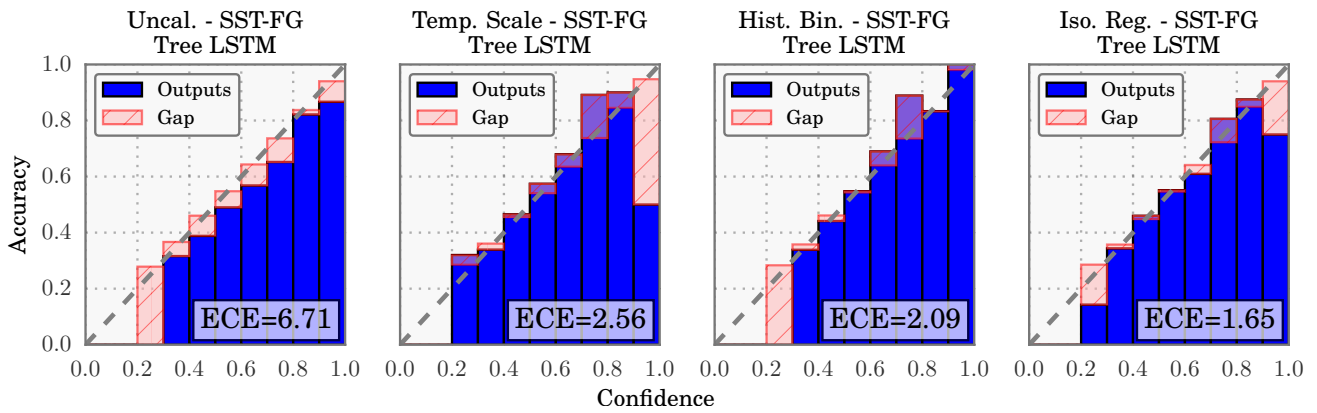

Figure S3. Reliability diagrams for SST Binary and SST Fine Grained before (far left) and after calibration (middle left, middle right, far right).

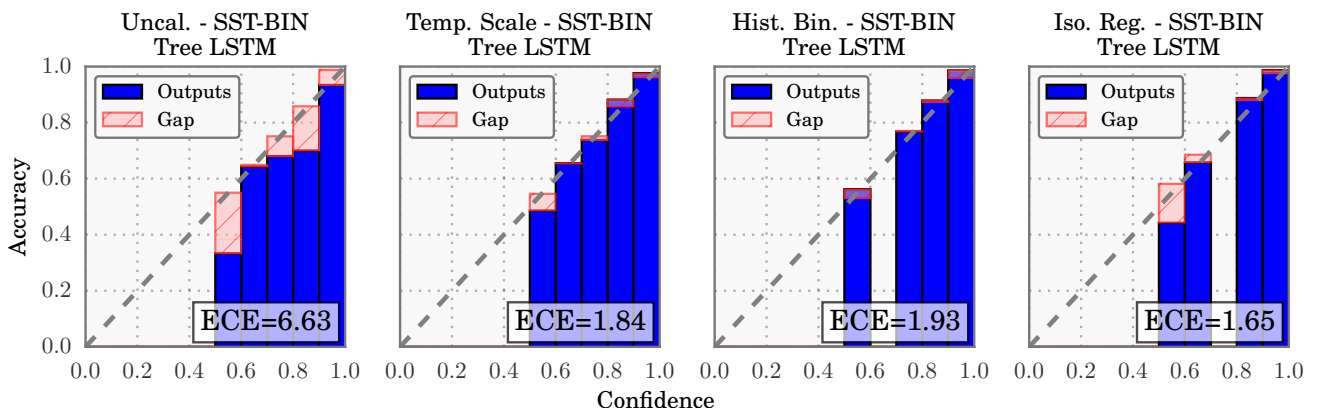

Figure S4. Reliability diagrams for SST Binary and SST Fine Grained before (far left) and after calibration (middle left, middle right, far right).
